# Supplementary material for: Tuning the formation of MOFs by pH influence: X-ray structural variations and Hirshfeld surface analyses of 2-amino-5-nitropyridine with cadmium chloride
Source: Royal Society of Chemistry journal article supplement (doi:10.1039/c2ce26682b), 2012-12-03
Supplement: c2ce26682b.pdf [file c2ce26682b.pdf]

**Supplementary information**

**Tuning the formation of MOFs by pH influence: X-ray structural variations and Hirshfeld Surface analyses of 2-Amino-5-nitropyridine with Cadmium Chloride**

**Saikat Kumar Seth\***

Department of Physics, M. G. Mahavidyalaya, Bhupatinagar, Midnapore (East) 721425, W.B., India

**Corresponding author E-mail:**

saikatim@yahoo.co.in

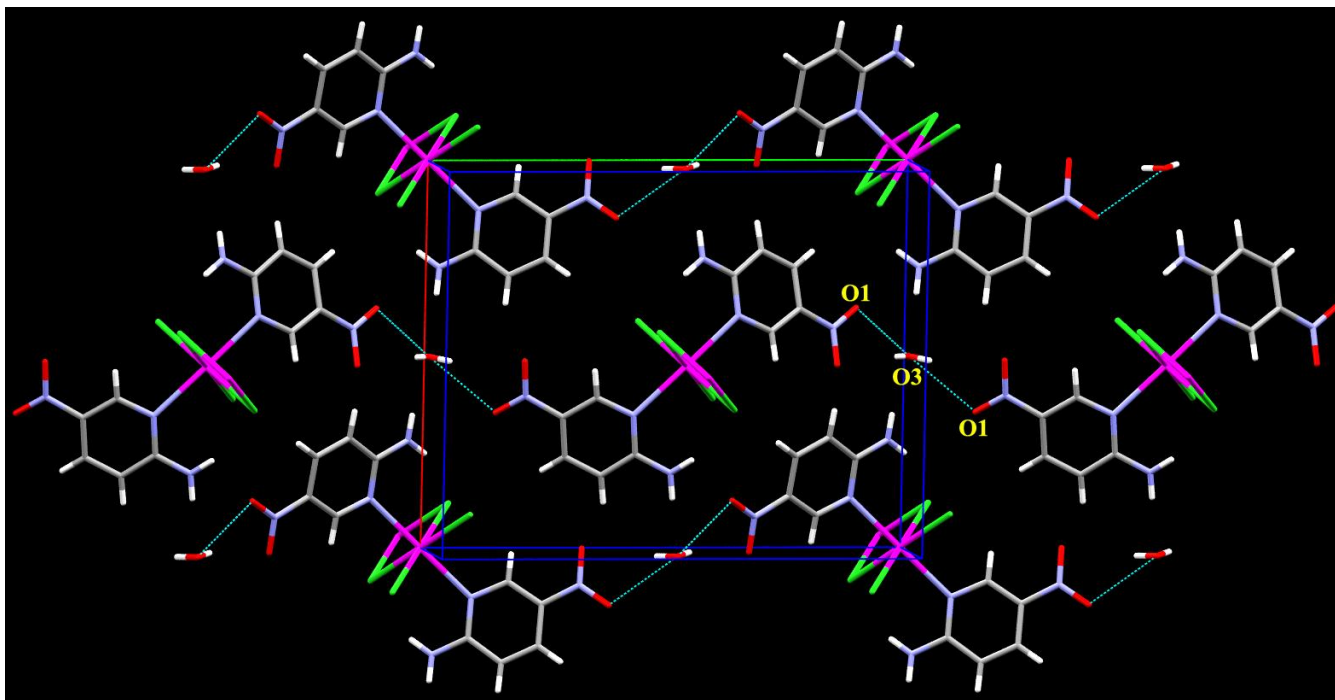

**Fig. S1** Formation 1D parallel chains propagating along (0 1 0) direction through O–H...O hydrogen bonds.

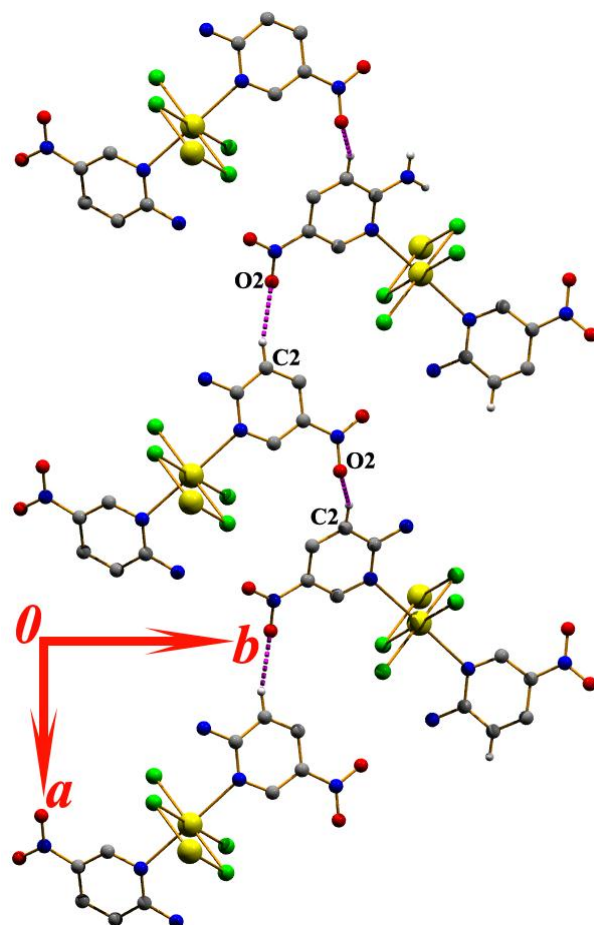

**Fig. S2** Propagation of 1D chain along (1 0 0) direction through C–H...O hydrogen bonds.

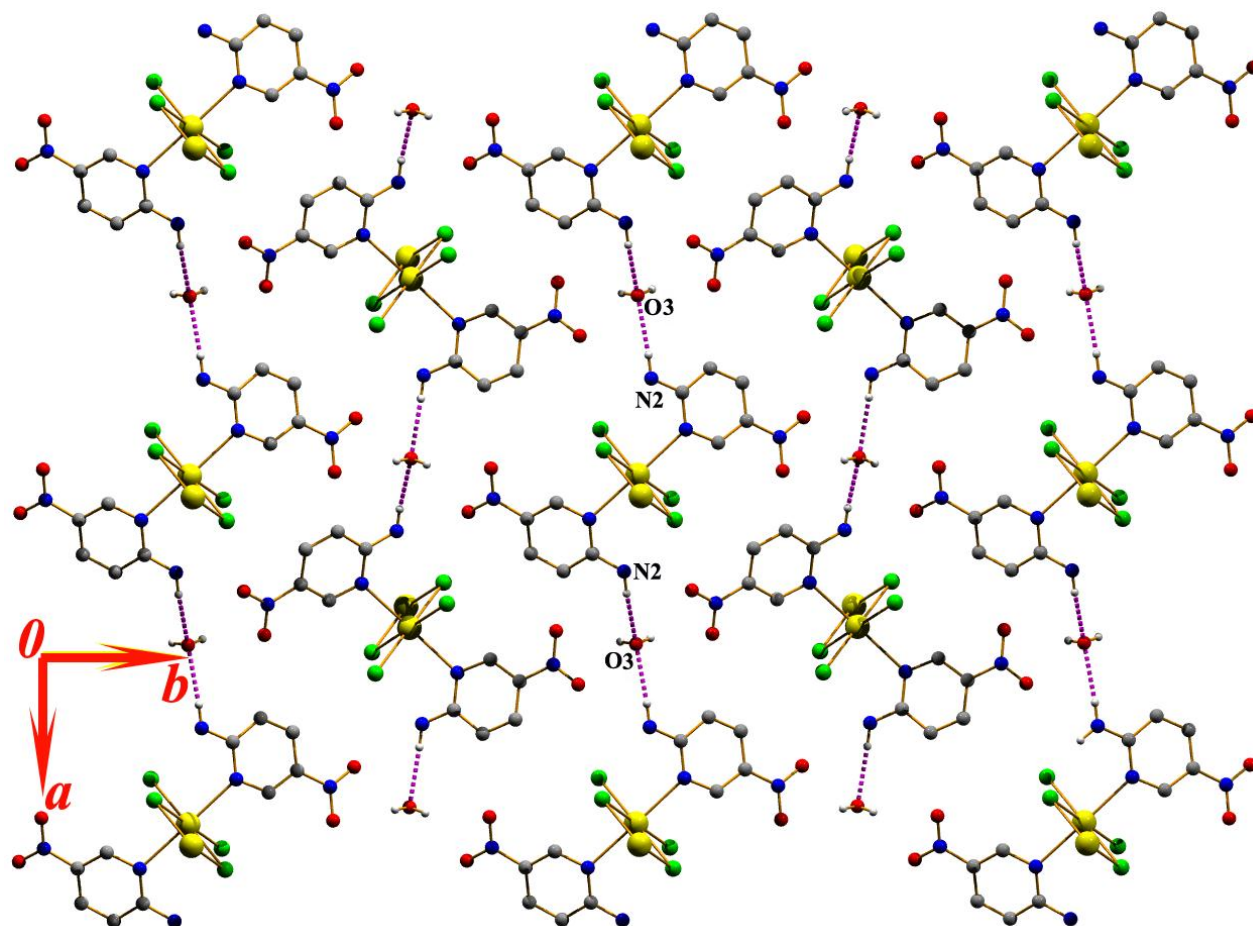

**Fig. S3 Formation 1D parallel chains propagating along (1 0 0) direction through N–H...O hydrogen bonds.**

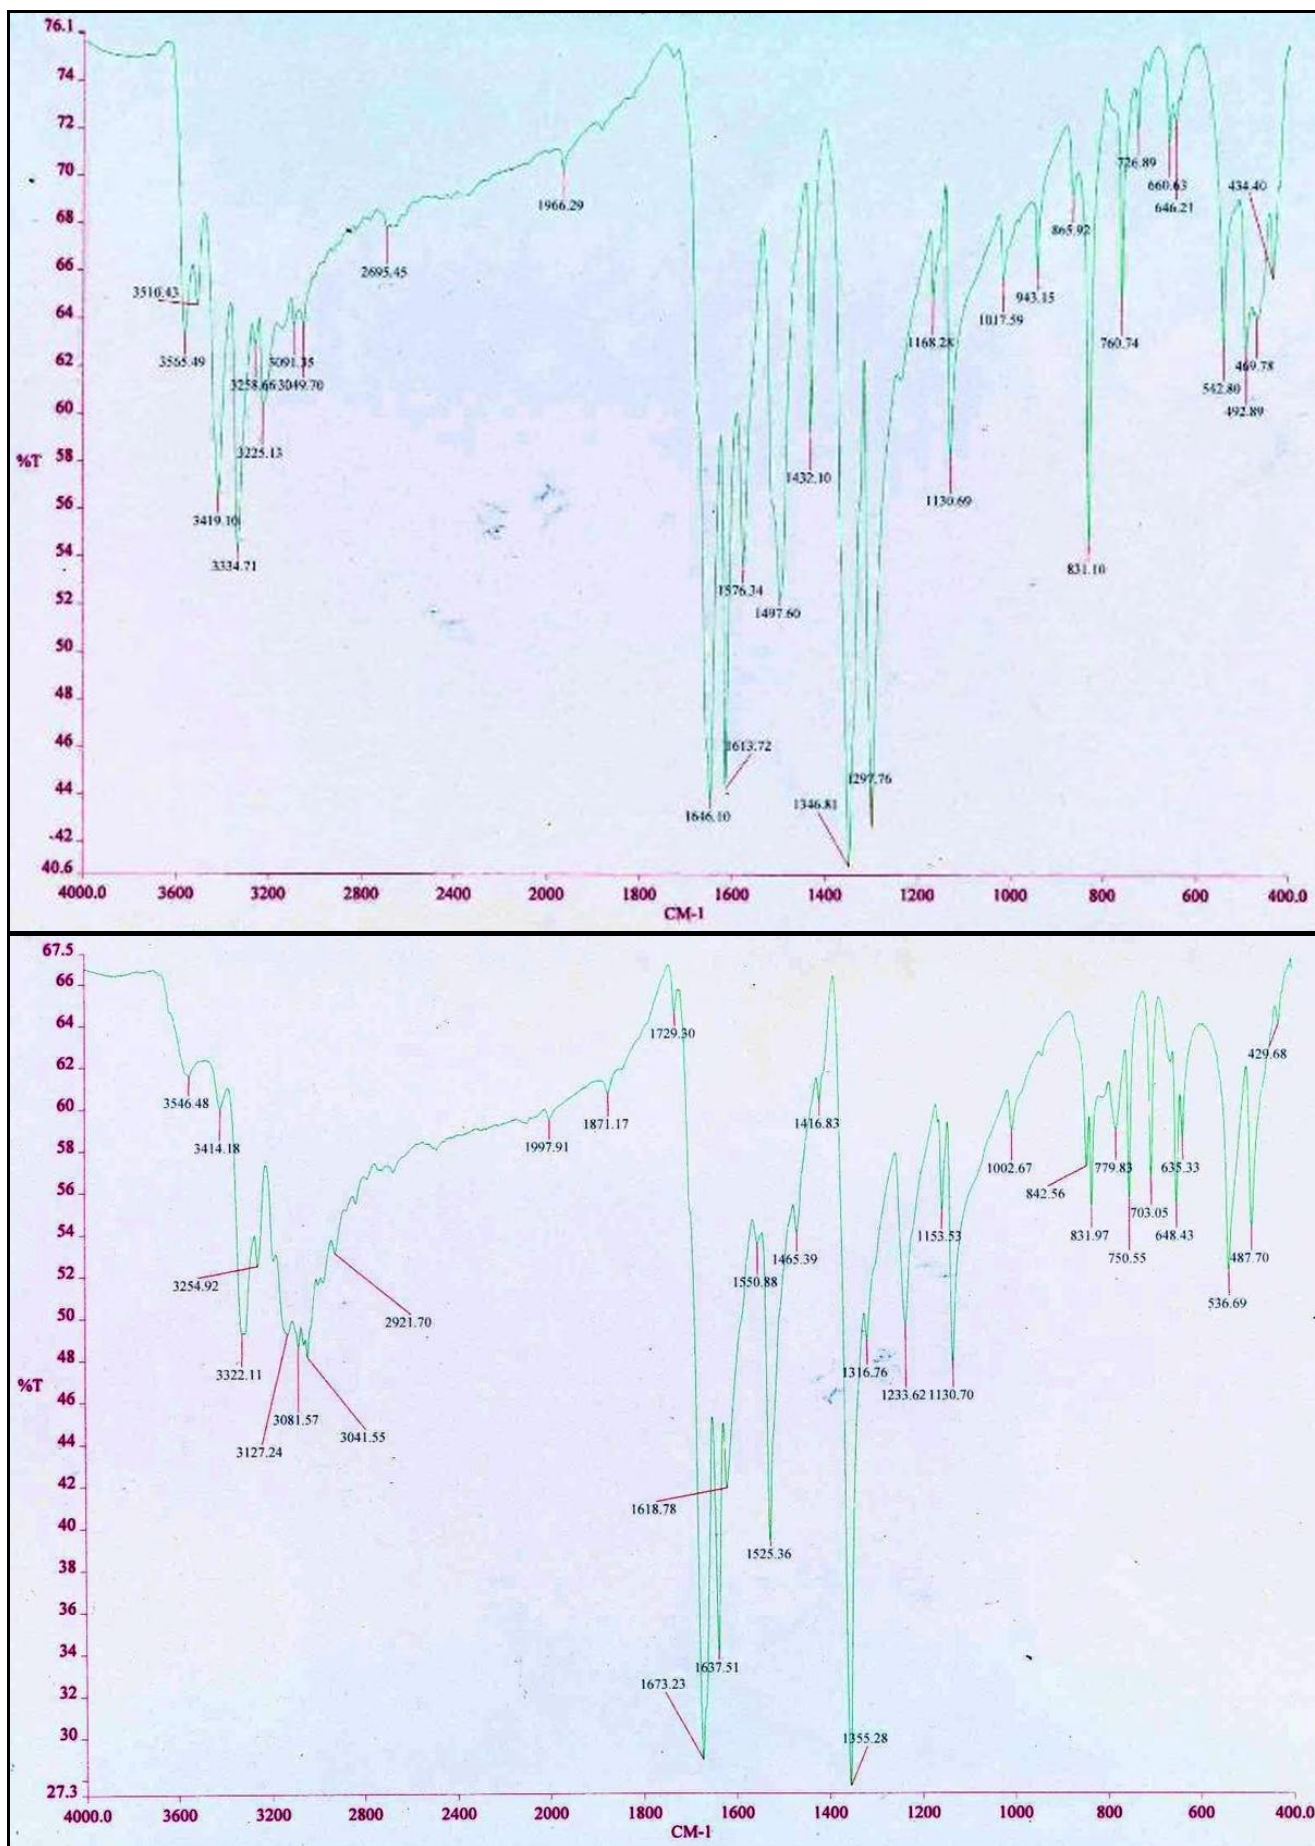

Fig. S4 FTIR spectra of complex-1(above) and complex-2(below).
